# Supplementary material for: USAEME-GC/MS Method for Easy and Sensitive Determination of Nine Bisphenol Analogues in Water and Wastewater
Source: MDPI journal article supplement (doi:10.3390/molecules27154977), 2022-08-05
Supplement: s1 [file s1]

---

## Supplementary Materials

# USAEME-GC/MS method for easy and sensitive determination of nine bisphenol analogues in water and wastewater

Dariusz Kiejza<sup>1</sup>, Weronika Polińska<sup>1</sup>, Joanna Karpińska<sup>2</sup> and Urszula Kotowska<sup>2,\*</sup>

<sup>1</sup> Doctoral School of Exact and Natural Sciences, University of Białystok, Ciołkowskiego 1K St., 15-245 Białystok, Poland; d.kiejza@uwb.edu.pl, w.polinska@uwb.edu.pl

<sup>2</sup> Department of Analytical and Inorganic Chemistry, Faculty of Chemistry, University of Białystok, Ciołkowskiego 1K St., 15-245 Białystok, Poland; joasia@uwb.edu.pl

\*Correspondence: ukrajew@uwb.edu.pl; Tel.: +48-85-738-8111

Abundance

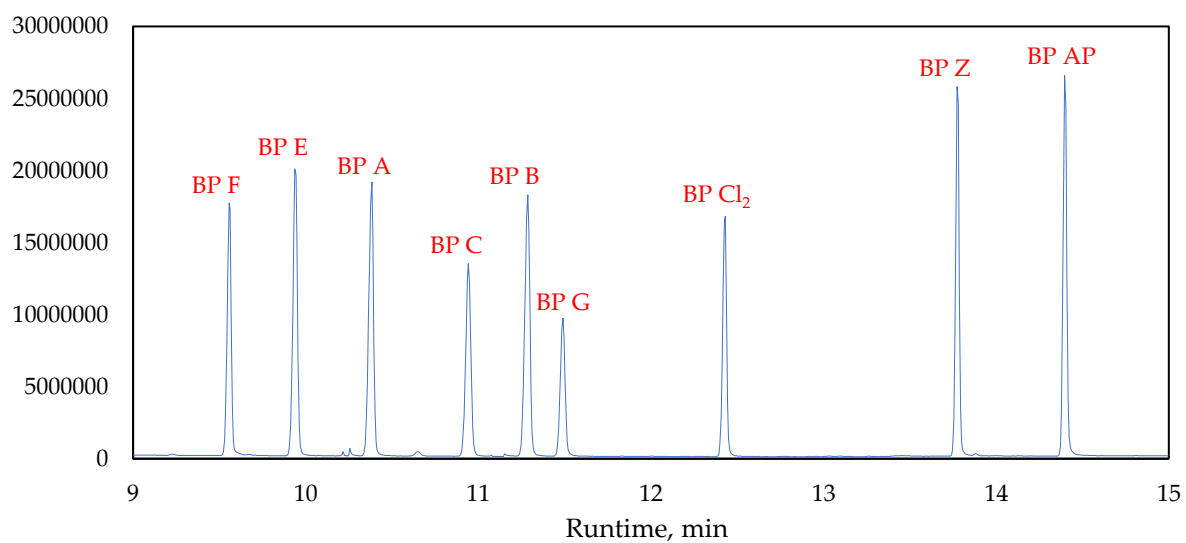

**Figure S1.** Chromatogram registered during GC-MS analysis of 500ug/L bisphenols mixture in Milli-Q water.

### Bisphenol F

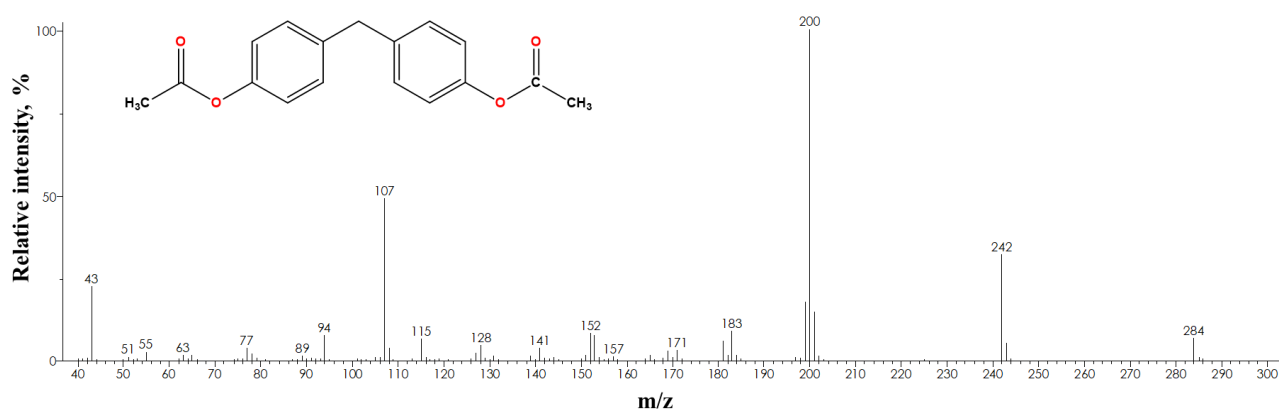

### Bisphenol E

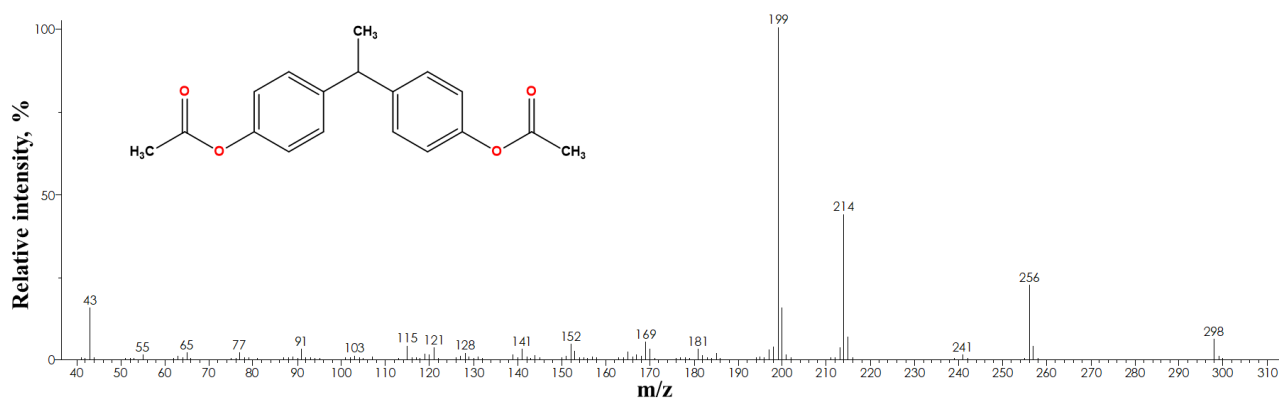

### Bisphenol A

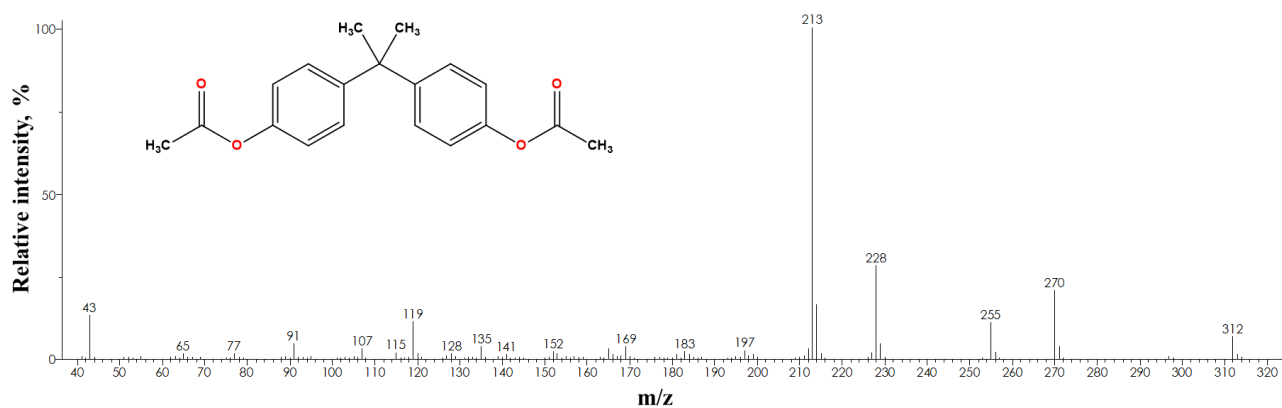

### Bisphenol C

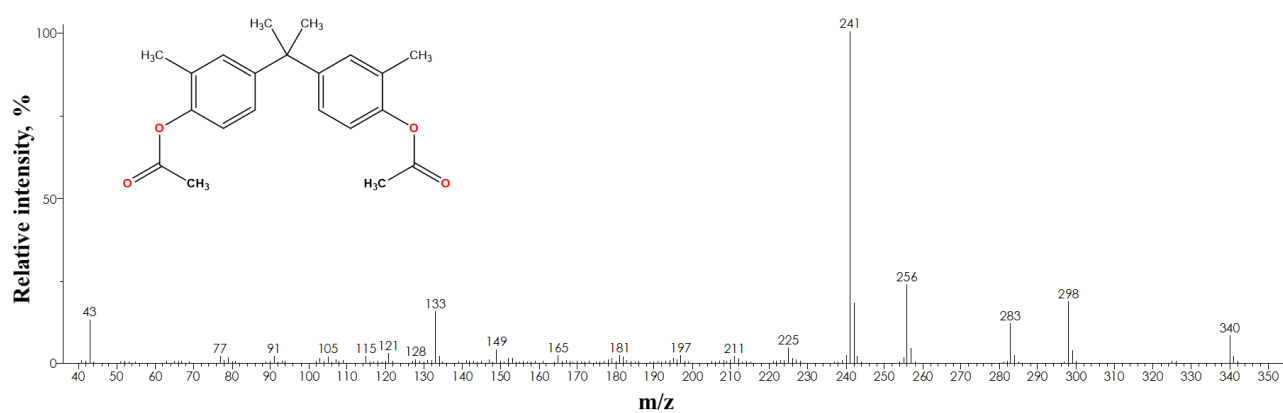

### Bisphenol B

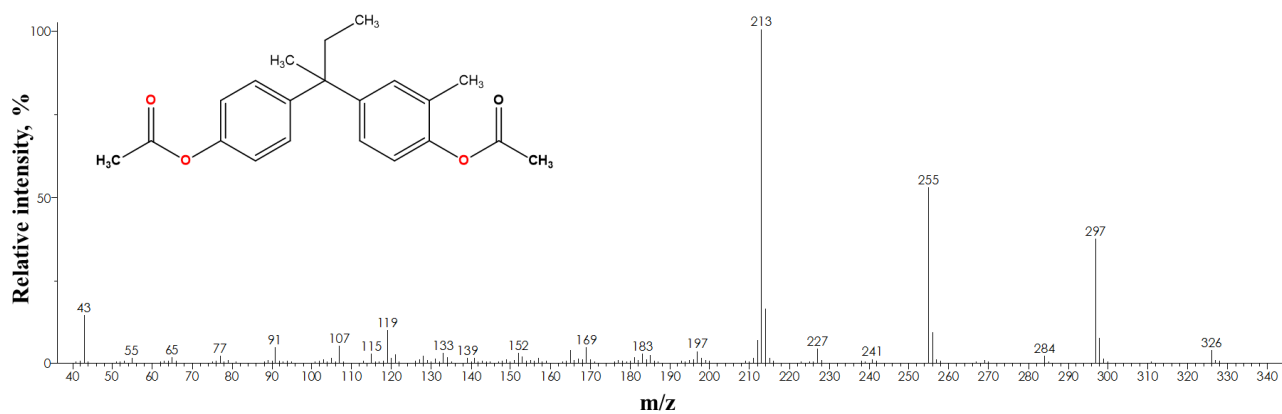

### Bisphenol G

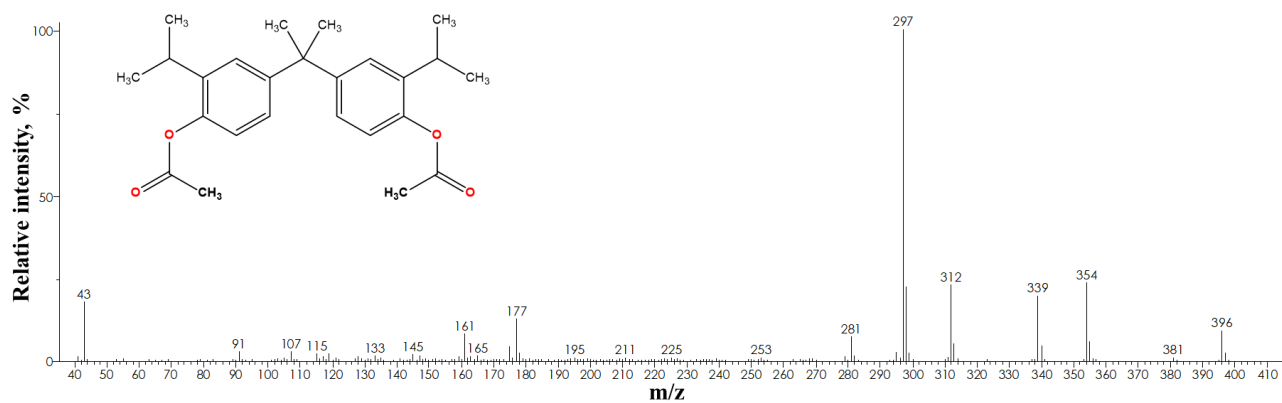

### Bisphenol Cl<sub>2</sub>

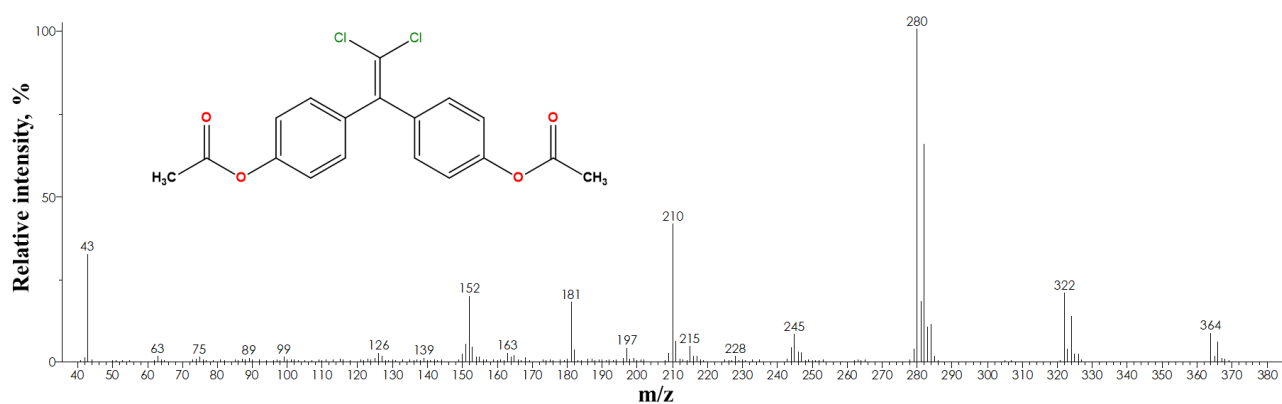

### Bisphenol Z

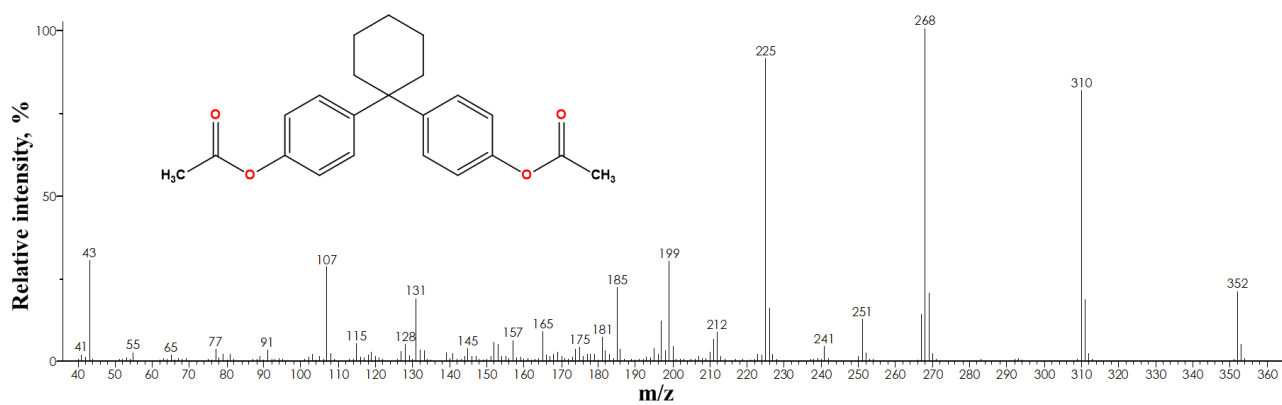

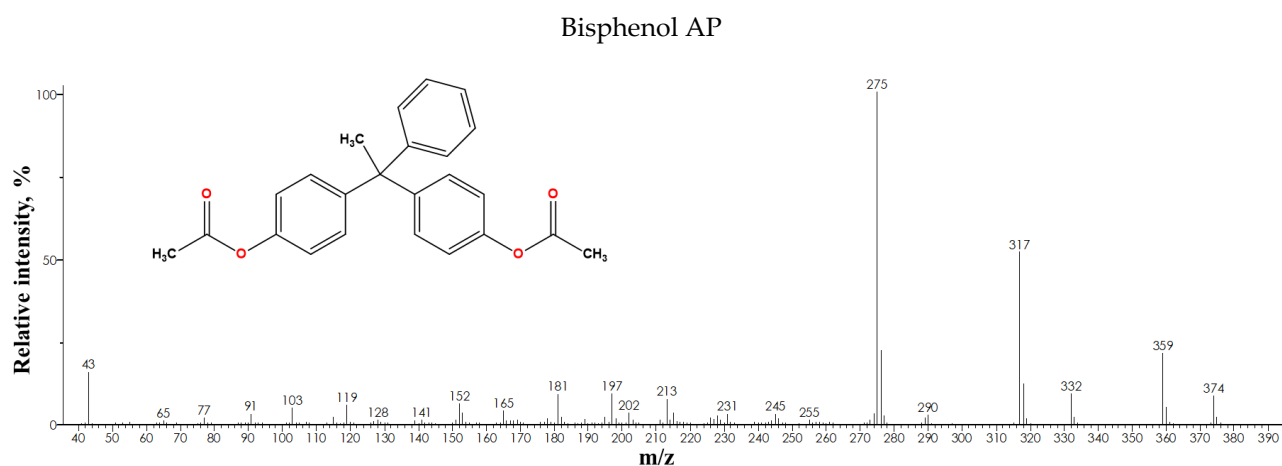

**Figure S2.** Mass spectra of acetylated bisphenols products registered in selected ions monitoring (SIM) mode.

**Table S1.** Response table for SNR of each controllable variables in BPF extraction process.

| Level | Chlorobenzene | Acetic anhydride | Salt  |
|-------|---------------|------------------|-------|
| 1     | 141.0         | 138.4            | 124.1 |
| 2     | 139.4         | 138.4            | 145.5 |
| 3     | 136.1         | 139.6            | 146.8 |
| Delta | 4.9           | 1.3              | 22.7  |
| Rank  | 2             | 3                | 1     |

**Table S2.** Response table for SNR of each controllable variables in BPE extraction process.

| Level | Chlorobenzene | Acetic anhydride | Salt  |
|-------|---------------|------------------|-------|
| 1     | 145.7         | 143.1            | 133.6 |
| 2     | 143.6         | 143.0            | 147.5 |
| 3     | 140.7         | 143.9            | 148.9 |
| Delta | 5.0           | 0.9              | 15.3  |
| Rank  | 2             | 3                | 1     |

**Table S3.** Response table for SNR of each controllable variables in BPA extraction process.

| Level | Chlorobenzene | Acetic anhydride | Salt  |
|-------|---------------|------------------|-------|
| 1     | 148.5         | 145.9            | 140.0 |
| 2     | 146.2         | 145.9            | 148.5 |
| 3     | 143.7         | 146.5            | 149.8 |
| Delta | 4.9           | 0.6              | 9.8   |
| Rank  | 2             | 3                | 1     |

**Table S4.** Response table for SNR of each controllable variables in BPC extraction process.

| Level | Chlorobenzene | Acetic anhydride | Salt  |
|-------|---------------|------------------|-------|
| 1     | 147.6         | 144.4            | 145.3 |
| 2     | 145.1         | 145.7            | 144.7 |
| 3     | 143.0         | 145.6            | 145.7 |
| Delta | 4.6           | 1.4              | 1.0   |
| Rank  | 1             | 2                | 3     |

**Table S5.** Response table for SNR of each controllable variables in BPB extraction process.

| Level | Chlorobenzene | Acetic anhydride | Salt  |
|-------|---------------|------------------|-------|
| 1     | 144.8         | 142.2            | 139.9 |
| 2     | 142.4         | 142.5            | 143.0 |
| 3     | 140.2         | 142.7            | 144.5 |
| Delta | 4.7           | 0.5              | 4.6   |
| Rank  | 1             | 3                | 2     |

**Table S6.** Response table for SNR of each controllable variables in BPG extraction process.

| Level | Chlorobenzene | Acetic anhydride | Salt  |
|-------|---------------|------------------|-------|
| 1     | 142.6         | 139.9            | 142.5 |
| 2     | 140.7         | 141.1            | 140.0 |
| 3     | 138.3         | 140.6            | 139.1 |
| Delta | 4.4           | 1.2              | 3.4   |
| Rank  | 1             | 3                | 2     |

**Table S7.** Response table for SNR of each controllable variables in BPCl<sub>2</sub> extraction process.

| Level | Chlorobenzene | Acetic anhydride | Salt  |
|-------|---------------|------------------|-------|
| 1     | 145.5         | 142.8            | 141.6 |
| 2     | 142.8         | 142.9            | 142.8 |
| 3     | 140.6         | 143.2            | 144.4 |
| Delta | 4.9           | 0.4              | 2.8   |
| Rank  | 1             | 3                | 2     |

**Table S8.** Response table for SNR of each controllable variables in BPZ extraction process.

| Level | Chlorobenzene | Acetic anhydride | Salt  |
|-------|---------------|------------------|-------|
| 1     | 143.0         | 140.3            | 139.0 |
| 2     | 140.5         | 140.6            | 140.4 |
| 3     | 138.2         | 140.7            | 142.2 |
| Delta | 4.7           | 0.4              | 3.2   |
| Rank  | 1             | 3                | 2     |

**Table S9.** Response table for SNR of each controllable variables in BPAP extraction process.

| Level | Chlorobenzene | Acetic anhydride | Salt  |
|-------|---------------|------------------|-------|
| 1     | 142.9         | 140.6            | 139.6 |
| 2     | 140.7         | 140.4            | 140.1 |
| 3     | 138.4         | 141.0            | 142.3 |
| Delta | 4.5           | 0.5              | 2.6   |
| Rank  | 1             | 3                | 2     |

Table S10. ANOVA for BPF extraction optimization process.

| Source            | DF | Seq SS                                 | Adj SS  | Adj MS  | F      | P     | Percentage contribution |
|-------------------|----|----------------------------------------|---------|---------|--------|-------|-------------------------|
| PhCl              | 2  | 37,02                                  | 37,017  | 18,508  | 8,93   | 0,101 | 3,64                    |
| Ac <sub>2</sub> O | 2  | 3,05                                   | 3,049   | 1,524   | 0,74   | 0,576 | 0,30                    |
| Salt              | 2  | 972,17                                 | 972,172 | 486,086 | 234,63 | 0,004 | 95,65                   |
| Residual Error    | 2  | 4.14                                   | 4.143   | 2.072   |        |       | 0,41                    |
| Total             | 8  | 1016.38                                |         |         |        |       | 100                     |
|                   |    | <b>S= 1.4394</b>                       |         |         |        |       |                         |
| Model summary     |    | <b>R<sup>2</sup>= 99,59 %</b>          |         |         |        |       |                         |
|                   |    | <b>Adjusted R<sup>2</sup>= 98.37 %</b> |         |         |        |       |                         |

Table S11. ANOVA for BPE extraction optimization process.

| Source            | DF | Seq SS                                 | Adj SS  | Adj MS  | F      | P     | Percentage contribution |
|-------------------|----|----------------------------------------|---------|---------|--------|-------|-------------------------|
| PhCl              | 2  | 37,693                                 | 37,693  | 18,847  | 14,05  | 0,066 | 8,01                    |
| Ac <sub>2</sub> O | 2  | 1,479                                  | 1,479   | 0,740   | 0,55   | 0,645 | 0,31                    |
| Salt              | 2  | 428,662                                | 428,662 | 214,331 | 159,79 | 0,006 | 91,10                   |
| Residual Error    | 2  | 2,683                                  | 2,683   | 1,341   |        |       | 0,58                    |
| Total             | 8  | 470,518                                |         |         |        |       | 100                     |
|                   |    | <b>S= 1.1582</b>                       |         |         |        |       |                         |
| Model summary     |    | <b>R<sup>2</sup>= 99,43 %</b>          |         |         |        |       |                         |
|                   |    | <b>Adjusted R<sup>2</sup>= 97.72 %</b> |         |         |        |       |                         |

Table S12. ANOVA for BPC extraction optimization process.

| Source            | DF | Seq SS                                 | Adj SS  | Adj MS  | F     | P     | Percentage contribution |
|-------------------|----|----------------------------------------|---------|---------|-------|-------|-------------------------|
| PhCl              | 2  | 31,6884                                | 31,6884 | 15,8442 | 88,11 | 0,011 | 85,69                   |
| Ac <sub>2</sub> O | 2  | 3,4564                                 | 3,4564  | 1,7282  | 9,61  | 0,094 | 9,35                    |
| Salt              | 2  | 1,4756                                 | 1,4756  | 0,7378  | 4,10  | 0,196 | 3,99                    |
| Residual Error    | 2  | 0,3596                                 | 0,3596  | 0,1798  |       |       | 0,97                    |
| Total             | 8  | 36,9800                                |         |         |       |       | 100                     |
|                   |    | <b>S= 0.4240</b>                       |         |         |       |       |                         |
| Model summary     |    | <b>R<sup>2</sup>= 99,03 %</b>          |         |         |       |       |                         |
|                   |    | <b>Adjusted R<sup>2</sup>= 96.11 %</b> |         |         |       |       |                         |

Table S13. ANOVA for BPB extraction optimization process.

| Source            | DF | Seq SS                                 | Adj SS  | Adj MS  | F     | P     | Percentage contribution |
|-------------------|----|----------------------------------------|---------|---------|-------|-------|-------------------------|
| PhCl              | 2  | 32,6099                                | 32,6099 | 16,3050 | 26,89 | 0,036 | 48,25                   |
| Ac <sub>2</sub> O | 2  | 0,4205                                 | 0,4205  | 0,2102  | 0,35  | 0,743 | 0,62                    |
| Salt              | 2  | 33,3456                                | 33,3456 | 16,6728 | 27,49 | 0,035 | 49,33                   |
| Residual Error    | 2  | 1,2129                                 | 1,2129  | 0,6064  |       |       | 1,8                     |
| Total             | 8  | 67,5889                                |         |         |       |       | 100                     |
|                   |    | <b>S= 0.7787</b>                       |         |         |       |       |                         |
| Model summary     |    | <b>R<sup>2</sup>= 98.21 %</b>          |         |         |       |       |                         |
|                   |    | <b>Adjusted R<sup>2</sup>= 92.82 %</b> |         |         |       |       |                         |

**Table S14.** ANOVA for BPG extraction optimization process.

| Source            | DF | Seq SS                                 | Adj SS | Adj MS | F     | P     | Percentage contribution |
|-------------------|----|----------------------------------------|--------|--------|-------|-------|-------------------------|
| PhCl              | 2  | 29,150                                 | 29,150 | 14,575 | 14,22 | 0,066 | 56,37                   |
| Ac <sub>2</sub> O | 2  | 2,017                                  | 2,017  | 1,009  | 0,98  | 0,504 | 3,90                    |
| Salt              | 2  | 18,491                                 | 18,491 | 9,245  | 9,02  | 0,100 | 35,76                   |
| Residual Error    | 2  | 2,050                                  | 2,050  | 1,025  |       |       | 3,97                    |
| Total             | 8  | 51,708                                 |        |        |       |       | 100                     |
|                   |    | <b>S= 1.0124</b>                       |        |        |       |       |                         |
| Model summary     |    | <b>R<sup>2</sup>= 96.04 %</b>          |        |        |       |       |                         |
|                   |    | <b>Adjusted R<sup>2</sup>= 84.14 %</b> |        |        |       |       |                         |

**Table S15.** ANOVA for BPCl<sub>2</sub> extraction optimization process.

| Source            | DF | Seq SS                                 | Adj SS  | Adj MS  | F     | P     | Percentage contribution |
|-------------------|----|----------------------------------------|---------|---------|-------|-------|-------------------------|
| PhCl              | 2  | 35,9486                                | 35,9486 | 17,9743 | 42,86 | 0,023 | 74,01                   |
| Ac <sub>2</sub> O | 2  | 0,2181                                 | 0,2181  | 0,1091  | 0,26  | 0,794 | 0,45                    |
| Salt              | 2  | 11,5652                                | 11,5652 | 5,7826  | 13,79 | 0,068 | 23,81                   |
| Residual Error    | 2  | 0,8388                                 | 0,8388  | 0,4194  |       |       | 1,73                    |
| Total             | 8  | 48,5707                                |         |         |       |       | 100                     |
|                   |    | <b>S= 0.6476</b>                       |         |         |       |       |                         |
| Model summary     |    | <b>R<sup>2</sup>= 98.27 %</b>          |         |         |       |       |                         |
|                   |    | <b>Adjusted R<sup>2</sup>= 93.09 %</b> |         |         |       |       |                         |

**Table S16.** ANOVA for BPZ extraction optimization process.

| Source            | DF | Seq SS                                 | Adj SS  | Adj MS  | F     | P     | Percentage contribution |
|-------------------|----|----------------------------------------|---------|---------|-------|-------|-------------------------|
| PhCl              | 2  | 33,8580                                | 33,8580 | 16,9290 | 28,26 | 0,034 | 66,95                   |
| Ac <sub>2</sub> O | 2  | 0,2544                                 | 0,2544  | 0,1272  | 0,21  | 0,825 | 0,50                    |
| Salt              | 2  | 15,2605                                | 15,2605 | 7,6303  | 12,74 | 0,073 | 30,18                   |
| Residual Error    | 2  | 1,1983                                 | 1,1983  | 0,5992  |       |       | 2,37                    |
| Total             | 8  | 50,5713                                |         |         |       |       | 100                     |
|                   |    | <b>S= 0.7740</b>                       |         |         |       |       |                         |
| Model summary     |    | <b>R<sup>2</sup>= 97.63 %</b>          |         |         |       |       |                         |
|                   |    | <b>Adjusted R<sup>2</sup>= 90.52 %</b> |         |         |       |       |                         |

**Table S17.** ANOVA for BPAP extraction optimization process.

| Source            | DF | Seq SS                                 | Adj SS  | Adj MS  | F     | P     | Percentage contribution |
|-------------------|----|----------------------------------------|---------|---------|-------|-------|-------------------------|
| PhCl              | 2  | 30,1033                                | 30,1033 | 15,0516 | 46,96 | 0,021 | 69,74                   |
| Ac <sub>2</sub> O | 2  | 0,4197                                 | 0,4197  | 0,2099  | 0,65  | 0,604 | 0,97                    |
| Salt              | 2  | 12,0030                                | 12,0030 | 6,0015  | 18,73 | 0,051 | 27,80                   |
| Residual Error    | 2  | 0,6410                                 | 0,6410  | 0,3205  |       |       | 1,49                    |
| Total             | 8  | 43,1670                                |         |         |       |       | 100                     |
|                   |    | <b>S= 0.5661</b>                       |         |         |       |       |                         |
| Model summary     |    | <b>R<sup>2</sup>= 98.52 %</b>          |         |         |       |       |                         |
|                   |    | <b>Adjusted R<sup>2</sup>= 94.06 %</b> |         |         |       |       |                         |
